# Supplementary material
Source: publisher site journal article supplement (https://www.dovepress.com/article/570281)
Supplement: Supplementary file 1 [file 570281%20Revised%20Supplementary%20Table%201.docx]

**Supplementary table 1: QoR-15 Scale Scoring**

| ****QoR-15 Scale**** | |
| --- | --- |
| **Indicator** | **Score** |
| Are you able to breathe easily? | Not at all, 0, 1, 2, 3, 4, 5, 6, 7, 8, 9, 10, Completely |
| Have you been able to enjoy food? | Not at all, 0, 1, 2, 3, 4, 5, 6, 7, 8, 9, 10, Completely |
| Do you feel rested? | Not at all, 0, 1, 2, 3, 4, 5, 6, 7, 8, 9, 10, Completely |
| Have you had good sleep? | Not at all, 0, 1, 2, 3, 4, 5, 6, 7, 8, 9, 10, Completely |
| Are you able to look after personal toilet and hygiene unaided? | Not at all, 0, 1, 2, 3, 4, 5, 6, 7, 8, 9, 10, Completely |
| Are you able to communicate with family or friends? | Not at all, 0, 1, 2, 3, 4, 5, 6, 7, 8, 9, 10, Completely |
| Do you feel supported by doctors and nurses? | Not at all, 0, 1, 2, 3, 4, 5, 6, 7, 8, 9, 10, Completely |
| Are you able to return to work or usual home activities? | Not at all, 0, 1, 2, 3, 4, 5, 6, 7, 8, 9, 10, Completely |
| Do you feel comfortable and in control of your own emotions? | Not at all, 0, 1, 2, 3, 4, 5, 6, 7, 8, 9, 10, Completely |
| Do you have a feeling of general well-being and health? | Not at all, 0, 1, 2, 3, 4, 5, 6, 7, 8, 9, 10, Completely |
| Have you had moderate pain (VAS 4–7)? | None of the time, 0, 1, 2, 3, 4, 5, 6, 7, 8, 9, 10 All of the time |
| Have you had severe pain (VAS >7)? | None of the time, 0, 1, 2, 3, 4, 5, 6, 7, 8, 9, 10 All of the time |
| Have you had nausea or vomiting? | None of the time, 0, 1, 2, 3, 4, 5, 6, 7, 8, 9, 10 All of the time |
| Have you been feeling worried or anxious? | None of the time, 0, 1, 2, 3, 4, 5, 6, 7, 8, 9, 10 All of the time |
| Have you been feeling sad or depressed? | None of the time, 0, 1, 2, 3, 4, 5, 6, 7, 8, 9, 10 All of the time |
